# Supplementary material for: Rotational spectra of five cyano derivatives of fluorene
Source: Royal Society of Chemistry journal article supplement (doi:10.1039/d4cp01924e), 2024-01-01
Supplement: d4cp01924e2.pdf [file d4cp01924e2.pdf]

## Rotational Spectra of Five Cyano Derivatives of Fluorene

Carlos Cabezas<sup>a\*</sup>, Jesús Janeiro<sup>b</sup>, Amanda L. Steber<sup>c</sup>, Dolores Pérez<sup>b</sup>, Celina Bermúdez<sup>c</sup>, Enrique Guitián<sup>b</sup>, Alberto Lesarri<sup>c</sup> and José Cernicharo<sup>a</sup>

<sup>a</sup> *Departamento de Astrofísica Molecular, Instituto de Física Fundamental (IFF-CSIC), C/ Serrano 121, 28006 Madrid, Spain*

<sup>b</sup> *Centro Singular de Investigación en Química Biolóxica e Materiais Moleculares (CiQUS) and Departamento de Química Orgánica, Universidade de Santiago de Compostela, 15782 Santiago de Compostela, Spain*

<sup>c</sup> *Departamento de Química Física y Química Inorgánica, Facultad de Ciencias-I.U. CINQUIMA, Universidad de Valladolid, E-47011 Valladolid, Spain*

\* Author to whom correspondence should be addressed. Electronic mail:

[carlos.cabezas@csic.es](mailto:carlos.cabezas@csic.es)

### Contents

|                                                                                          |    |
|------------------------------------------------------------------------------------------|----|
| <b>1. Synthesis of cyanofluorenes: experimental details and spectroscopic data</b> ..... | 2  |
| <b>1.1. General methods</b> .....                                                        | 2  |
| <b>1.2. Experimental procedures and characterization data</b> .....                      | 2  |
| <b>1.2.1. Synthesis of 9H-fluorene-1-cabonitrile (1-cyanofluorene, 1-CNF)</b> .....      | 2  |
| <b>1.2.2. Synthesis of 9H-fluorene-2-cabonitrile (2-cyanofluorene, 2-CNF)</b> .....      | 3  |
| <b>1.2.3. Synthesis of 9H-fluorene-3-cabonitrile (3-cyanofluorene, 3-CNF)</b> .....      | 3  |
| <b>1.2.4. Synthesis of 9H-fluorene-4-cabonitrile (4-cyanofluorene, 4-CNF)</b> .....      | 4  |
| <b>1.2.5. Synthesis of 9H-fluorene-9-cabonitrile (9-cyanofluorene, 9-CNF)</b> .....      | 4  |
| <b>2. <sup>1</sup>H and <sup>13</sup>C NMR spectra</b> .....                             | 6  |
| <b>3. References</b> .....                                                               | 11 |

# 1. Synthesis of cyanofluorenes: experimental details and spectroscopic data

## 1.1. General methods

All reactions were carried out under argon using oven-dried glassware. Anhydrous DMSO, CH<sub>2</sub>Cl<sub>2</sub>, Et<sub>2</sub>O, toluene and DMF were taken from a MBraun SPS-800 Solvent Purification System. Commercial reagents were purchased from ABCR GmbH, Sigma-Aldrich or Fluorochem, and were used without further purification. TLC was performed on Merck silica gel 60 F<sub>254</sub> and chromatograms were visualized with UV light (254 and 360 nm). Column chromatography was performed on Merck silica gel 60 (ASTM 230-400 mesh). Centrifugation was performed in a Hettich EBA21 centrifuge. <sup>1</sup>H and <sup>13</sup>C NMR spectra were recorded at 300 and 75 MHz (Varian Mercury-300 instrument), 400 and 101 MHz (Varian Inova 400) or 500 and 125 MHz (Varian Inova 500) respectively. Low resolution mass spectra (EI) were obtained at 70 eV on a HP-5988A instrument, while high-resolution mass spectra (HRMS) were obtained on a Micromass Autospec spectrometer. Atmospheric pressure chemical ionisation (APCI) HRMS were obtained on a Bruker Microtof, using either Direct Inlet Probe (DIP) or Flow Injection Analysis (FIA) for sample introduction.

## 1.2. Experimental procedures and characterization data.

### 1.2.1. Synthesis of 9H-fluorene-1-carbonitrile (1-cyanofluorene, 1-CNF).

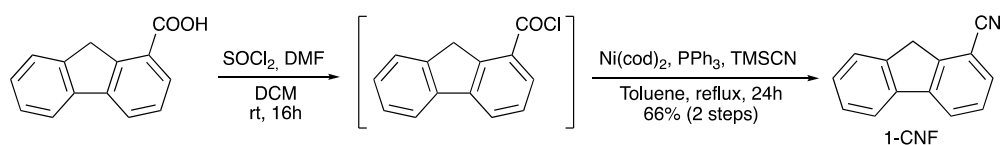

The compound was prepared according to an adapted literature procedure.<sup>1</sup>

In an oven-dried 25 mL double neck round bottom flask 9H-fluorene-1-carboxylic acid (504 mg, 2.39 mmol) was added. The flask was purged with Ar and then anhydrous CH<sub>2</sub>Cl<sub>2</sub> (9.6 mL), DMF (0.05 mL) and SOCl<sub>2</sub> (0.350 mL, 4.795 mmol) were added. The mixture was stirred at room temperature overnight and then, solvent, and unreacted SOCl<sub>2</sub> were removed under reduced pressure. The crude acyl chloride was used without any further purification. Ni(cod)<sub>2</sub> (6.6 mg, 0.024 mmol, 10 mol %) and PPh<sub>3</sub> (12.6 mg, 0.048 mmol, 20 mol%) were added and the flask was purged with Ar. The mixture was dissolved in 12 mL of toluene, TMSCN (0.360 mL, 2.877 mmol) was added and the resulting mixture was stirred under reflux for 24h. Et<sub>3</sub>N was added to quench the remaining TMSCN and, subsequently, organics were removed under reduced pressure and the product was purified by column chromatography on SiO<sub>2</sub> (hexane/CH<sub>2</sub>Cl<sub>2</sub>, 4:1) yielding 1-CNF

as pale yellow solid (305 mg, 66%). <sup>1</sup>H-NMR (300 MHz, CDCl<sub>3</sub>) δ: 7.99 – 7.90 (d, *J* = 6.6 1H), 7.78 (d, *J* = 6.6, 1H), 7.62 – 7.53 (m, 2H), 7.50 – 7.34 (m, 3H), 4.02 (s, 2H). <sup>13</sup>C-NMR (75 MHz, CDCl<sub>3</sub>) δ: 146.98 (C), 142.91 (C), 142.23 (C), 139.95 (C), 129.65 (CH), 128.08 (CH), 127.61 (CH), 127.29 (CH), 125.28 (CH), 123.92 (CH), 120.37 (CH), 117.64 (C), 109.33 (C), 36.64 (CH<sub>2</sub>). HRMS (APCI-DIP-TOF) for C<sub>14</sub>H<sub>9</sub>N ([M+H<sup>+</sup>]) Calcd.: 191.0808; Found: 191.0805.

### 1.2.2. Synthesis of 9*H*-fluorene-2-carbonitrile (2-cyanofluorene, 2-CNF).

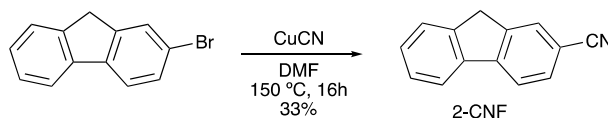

To a solution of 2-bromo-9*H*-fluorene (1 g, 4.08 mmol) in dry DMF (40.8 mL), cuprous cyanide (1.462 g, 16.31 mmol) was added, and the mixture was heated at 150 °C for 16h. Then, aqueous ammonia was added and the product was extracted with CH<sub>2</sub>Cl<sub>2</sub> (3x15 mL). The combined organic layers were dried with Na<sub>2</sub>SO<sub>4</sub>, filtered and evaporated under reduced pressure. The crude residue was purified by column chromatography on silica gel (Hexane/ EtOAc, 4:1) yielding 2-CNF as a pale yellow solid (257 mg, 33%). <sup>1</sup>H-NMR (300 MHz, CDCl<sub>3</sub>) δ: 7.88 – 7.80 (m, 3H), 7.67 (m, 1H), 7.60 (m, 1H), 7.46 – 7.37 (m, 2H), 3.95 (s, 2H). <sup>13</sup>C-NMR (75 MHz, CDCl<sub>3</sub>) δ: 146.23 (C), 143.90 (C), 143.63 (C), 139.91 (C), 131.18 (CH), 128.62 (CH), 128.57 (CH), 127.30 (CH), 125.31 (CH), 120.96 (CH), 120.37 (CH), 119.62 (C), 109.72 (C), 36.77 (CH<sub>2</sub>). HRMS (APCI-DIP-TOF) for C<sub>14</sub>H<sub>9</sub>N ([M+H<sup>+</sup>]) Calcd.: 191.0808; Found: 191.0802.

### 1.2.3. Synthesis of 9*H*-fluorene-3-carbonitrile (3-cyanofluorene, 3-CNF).

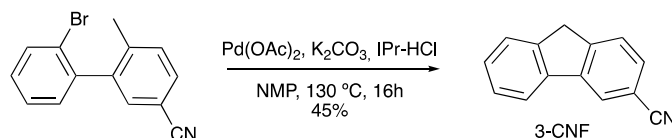

The compound was prepared according to an adapted literature procedure.<sup>2</sup>

2'-Bromo-6-methyl-[1,1'-biphenyl]-3-carbonitrile (720 mg, 2.64 mmol), K<sub>2</sub>CO<sub>3</sub> (365.6 mg, 2.64 mmol), Pd(OAc)<sub>2</sub> (11.9 mg, 0.053 mmol), IPr-HCl (45 mg, 0.106 mmol) were placed in a 25 mL Schlenk tube and purged with Ar. Then, dry NMP (8 mL) was added and the mixture was stirred at 150°C for 16h. After that, the solution was extracted with hexane and washed with water. The organic phase was dried over Na<sub>2</sub>SO<sub>4</sub>, filtered, and evaporated under reduced pressure. The

residue was purified by column chromatography on silica gel (Hexane/ EtOAc, 4:1) yielding 3-CNF as a pale yellow solid (230 mg, 45%).<sup>1</sup> **H-NMR** (300 MHz, CDCl<sub>3</sub>)  $\delta$ : 8.03 (s, 1H), 7.81 (d,  $J$  = 7.6, 1H), 7.64 – 7.57 (m, 3H), 7.46 – 7.36 (m, 2H), 3.98 (s, 2H). **<sup>13</sup>C-NMR** (75 MHz, CDCl<sub>3</sub>)  $\delta$ : 148.12 (C), 142.99 (C), 142.76 (C), 139.69 (C), 130.31 (CH), 128.14 (CH), 127.30 (CH), 125.78 (CH), 125.23 (CH), 123.42 (CH), 120.43 (CH), 119.42 (C), 110.77 (C), 37.32 (CH<sub>2</sub>). **HRMS (APCI-DIP-TOF)** for C<sub>14</sub>H<sub>9</sub>N ([M+H<sup>+</sup>]) Calcd.: 191.0808; Found: 191.0814.

#### 1.2.4. Synthesis of 9H-fluorene-4-carbonitrile (4-cyanofluorene, 4-CNF).

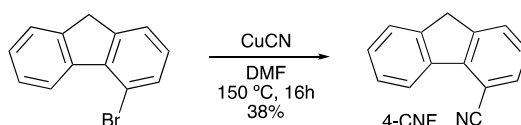

To a solution of 4-bromo-9H-fluorene (0.5 g, 2.04 mmol) in dry DMF (20.4 mL), cuprous cyanide (0.73 g, 8.159 mmol) was added, and the mixture was heated at 150 °C for 16h. Then, aqueous ammonia was added and the product was extracted with CH<sub>2</sub>Cl<sub>2</sub> (3x15 mL). The combined organic layers were dried with Na<sub>2</sub>SO<sub>4</sub>, filtered and evaporated under reduced pressure. The crude residue was purified by column chromatography on silica gel (Hexane/ EtOAc, 4:1) yielding 4-CNF as a pale yellow solid (147 mg, 38%). **<sup>1</sup>H-NMR** (300 MHz, CDCl<sub>3</sub>)  $\delta$ : 8.49 (d,  $J$  = 7.6, 1H), 7.75 (d,  $J$  = 7.6, 1H), 7.67 – 7.58 (m, 2H), 7.51 – 7.40 (m, 2H), 7.36 (t,  $J$  = 7.6 Hz, 1H), 3.93 (s, 2H). **<sup>13</sup>C-NMR** (75 MHz, CDCl<sub>3</sub>)  $\delta$ : 144.47 (C), 143.74 (C), 143.22 (C), 138.94 (C), 131.44 (CH), 129.21 (CH), 128.57 (CH), 127.42 (CH), 126.50 (CH), 125.02 (CH), 122.42 (CH), 118.44 (C), 104.37 (C), 36.62 (CH<sub>2</sub>). **HRMS (APCI-DIP-TOF)** for C<sub>14</sub>H<sub>9</sub>N ([M+H<sup>+</sup>]) Calcd.: 191.0730; Found: 191.0722.

#### 1.2.5. Synthesis of 9H-fluorene-9-carbonitrile (9-cyanofluorene, 9-CNF).

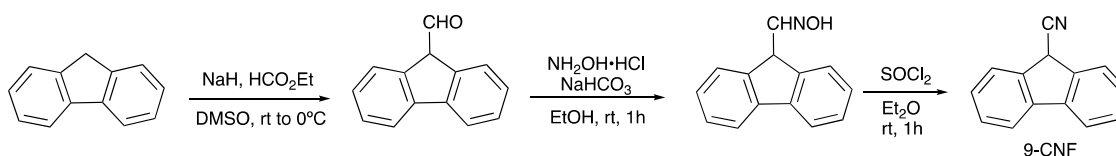

The compound was prepared according to an adapted literature procedure.<sup>3</sup>

To a stirred solution of fluorene (2 g, 12.03 mmol) in dry DMSO (40.1 mL), NaH (5.29 g, 132.35 mmol, 60% dispersion in mineral oil) was added and stirred at room temperature for 30 minutes.

Then, ethyl formiate (6 mL, 74.6 mmol) was added at 0°C and stirred overnight allowing the mixture to reach rt. The reaction was quenched with H<sub>2</sub>O and the pH adjusted to 1 with HCl. Organics were extracted with Et<sub>2</sub>O, dried over Na<sub>2</sub>SO<sub>4</sub>, filtered, and concentrated under reduced pressure. The crude aldehyde was mixed with NH<sub>2</sub>OH-HCl (1.25 g, 18.04 mmol) and NaHCO<sub>3</sub> (2.02 g, 24.06 mmol) in 60 mL of EtOH and stirred at room temperature for 2h. The reaction crude was filtered, and the filtrate was concentrated under reduced pressure. The crude oxime was dissolved in 40 mL of Et<sub>2</sub>O and SOCl<sub>2</sub> (0.87 mL, 12.03 mmol) was added, and the mixture stirred overnight. Then, H<sub>2</sub>O was added, and organics extracted with CH<sub>2</sub>Cl<sub>2</sub>, dried over Na<sub>2</sub>SO<sub>4</sub>, filtered, and concentrated under reduced pressure. The crude compound was purified by column chromatography on SiO<sub>2</sub> (hexane/CH<sub>2</sub>Cl<sub>2</sub>, 4:1) yielding 9-CNF as a pale yellow solid (1.23g, 56%). **<sup>1</sup>H-NMR** (300 MHz, CDCl<sub>3</sub>) δ: 7.80 – 7.77 (m, 2H), 7.74 – 7.70 (m, 2H), 7.53 – 7.46 (m, 2H), 7.41 (td, J = 7.5, 1.3 Hz, 2H), 4.93 (s, 1H). **<sup>13</sup>C-NMR** (75 MHz, CDCl<sub>3</sub>) δ: 140.89 (2xC), 137.85 (2xC), 129.28 (2xCH), 128.18 (2xCH), 125.10 (2xCH), 120.58 (2xCH), 118.10 (C), 37.07 (CH). **HRMS (APCI-DIP-TOF)** for C<sub>14</sub>H<sub>9</sub>N ([M<sup>+</sup>]) Calcd.: 191.0730; Found: 191.0729.

## 2. $^1\text{H}$ and $^{13}\text{C}$ NMR spectra

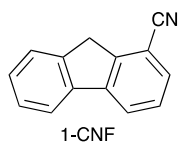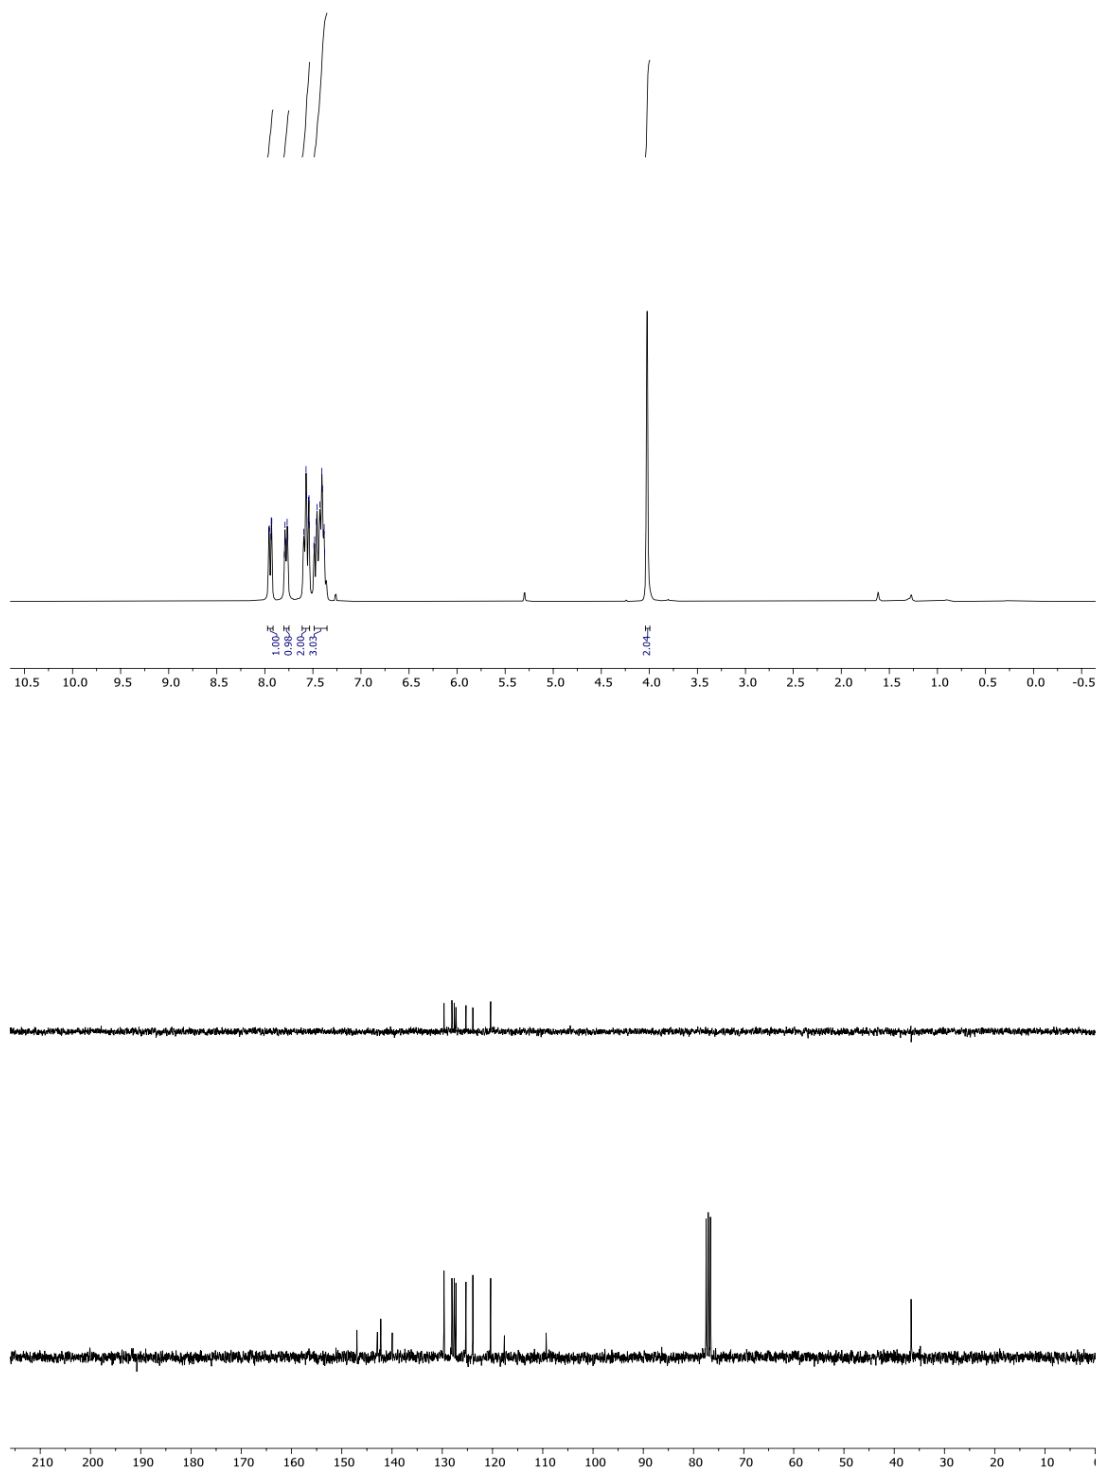

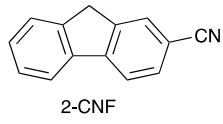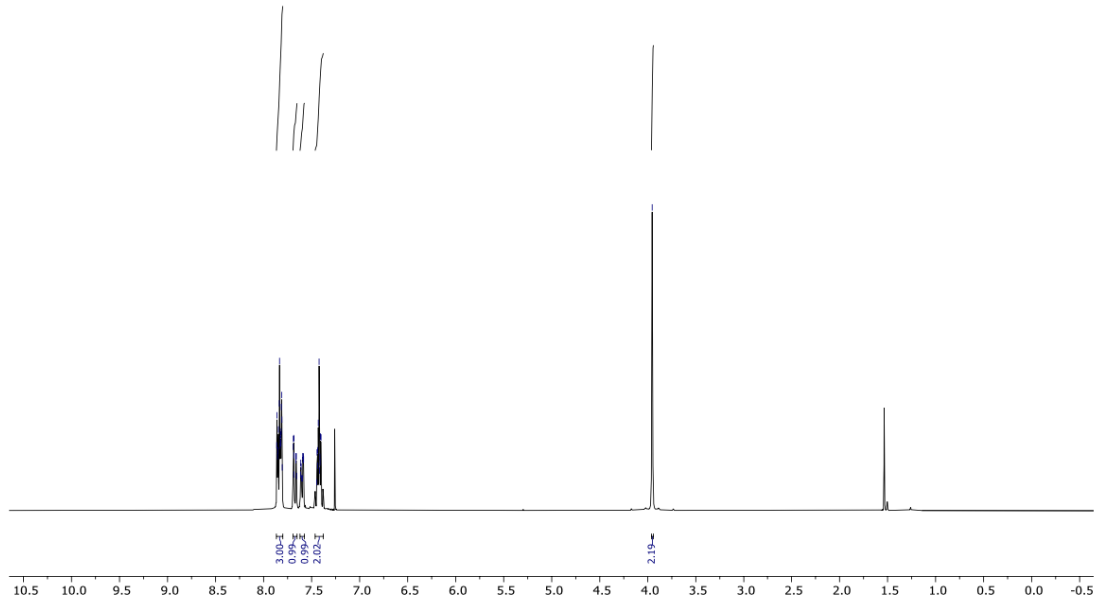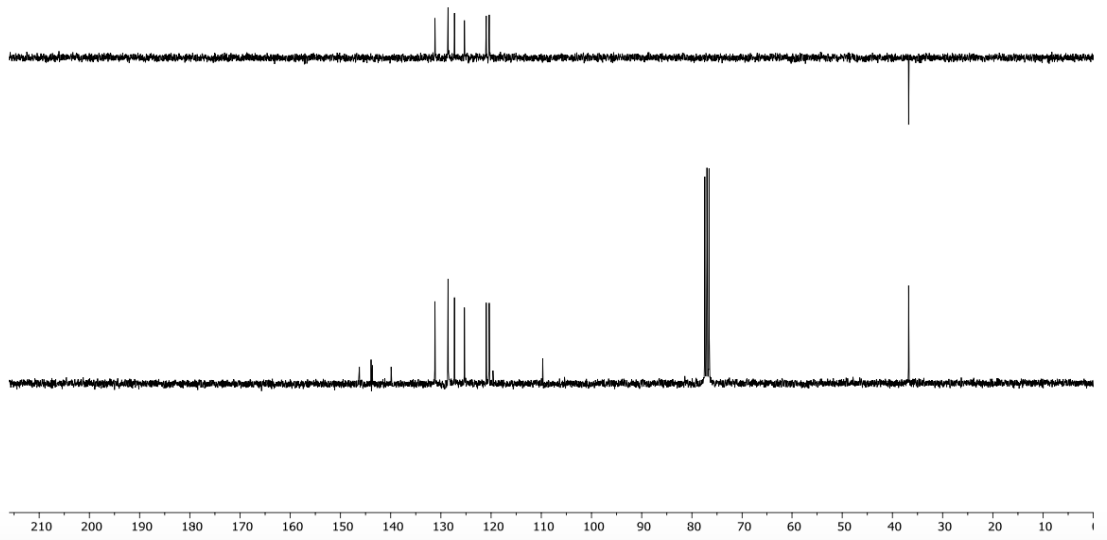

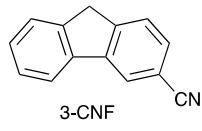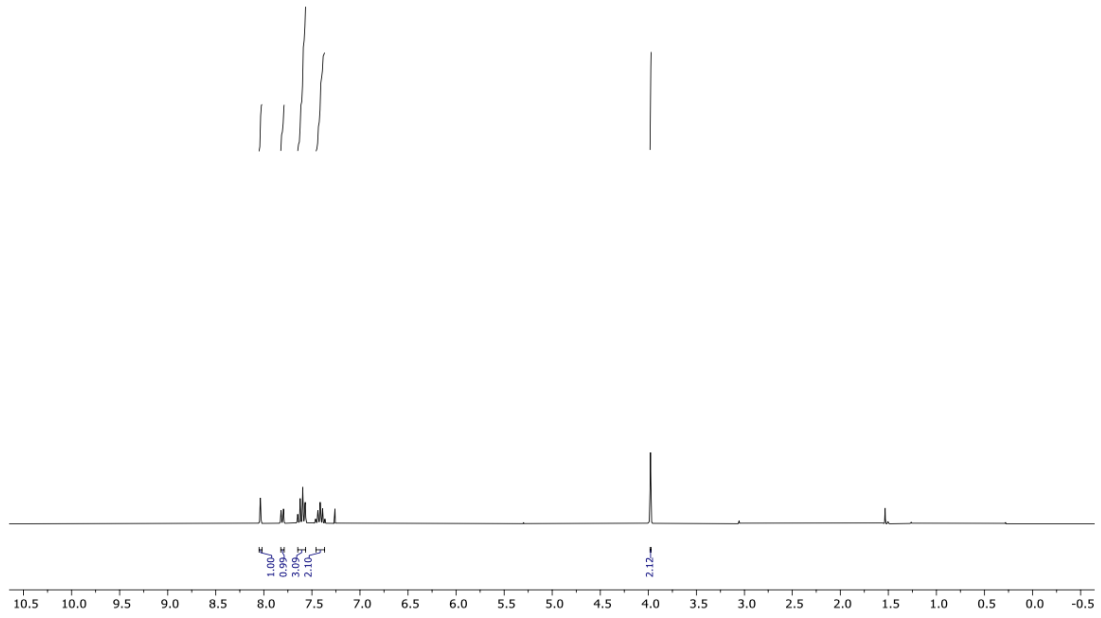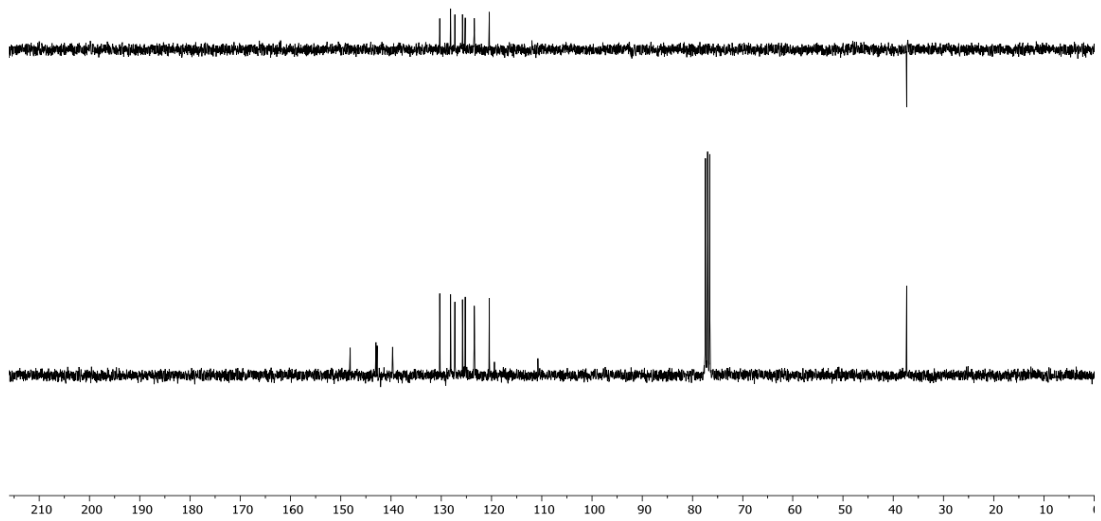



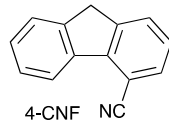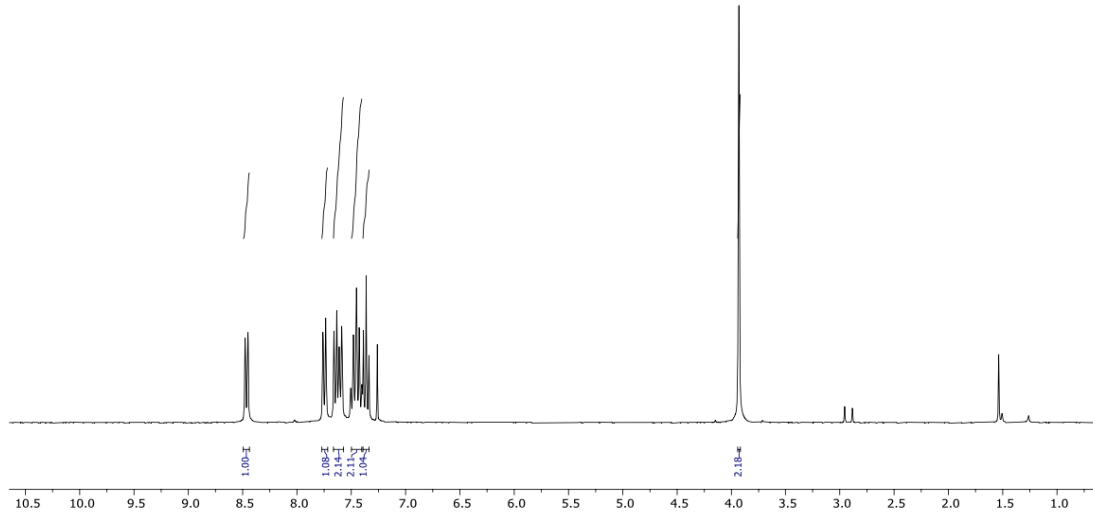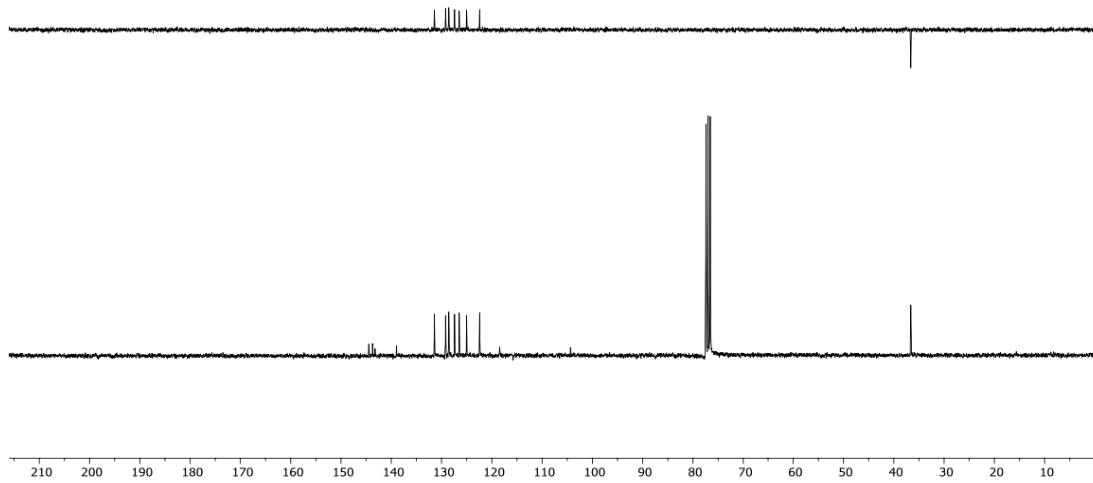

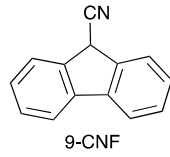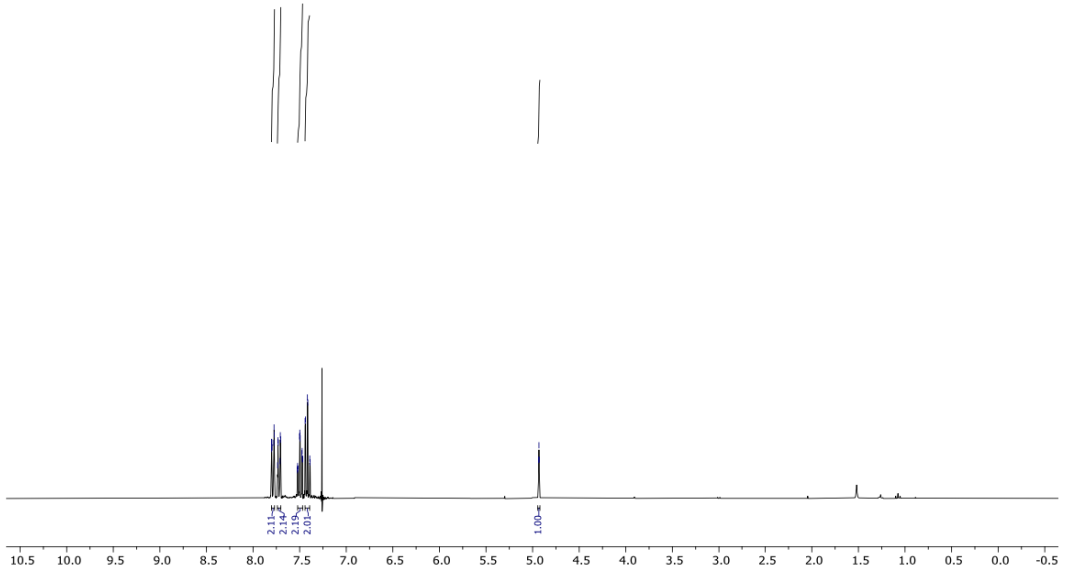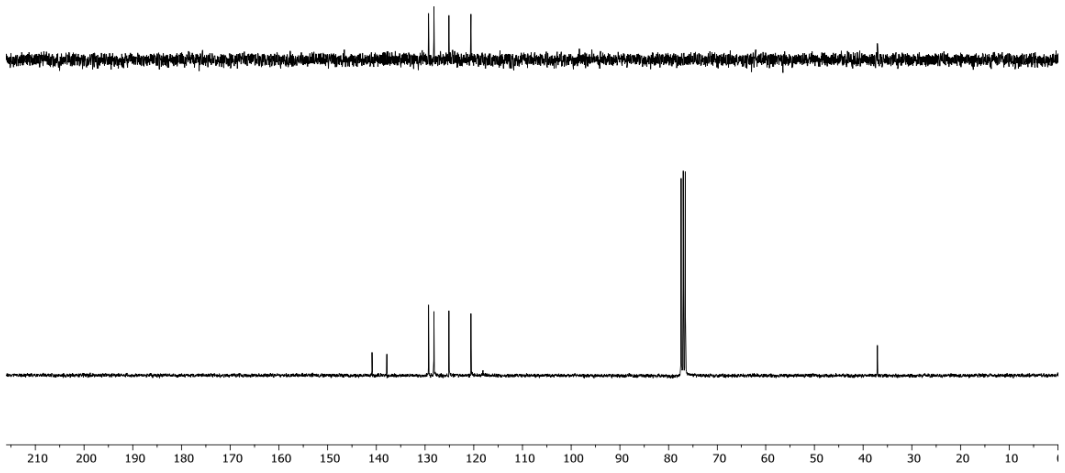

### 3. References

1. W. Zhenhua, W. Xiu, U. Yasuyuki, N. Yasushi. Nickel-Catalyzed Decarbonylative Cyanation of Acyl Chlorides, *Org. Lett.*, 2019, **21**, 6779-6784.
2. C. Hsiao, Y. Lin, C. Liu, T. Wu, Y. Wu. Synthesis of Methylene-Bridge Polyarenes through Palladium-Catalyzed Activation of Benzylic Carbon-Hydrogen Bond, *Adv. Synth. Catal.*, 2010, **352**, 3267–3274.
3. X. Hou, Z. Ge, T. Wang, W. Guo, J. Wu, J. Cui, C. Lai, R. Li. Synthesis and Structure-Activity Relationships of A Novel Class of Dithiocarbamic Acid Esters as Anticancer Agent, *Arch. Pharm. Chem. Life Sci.*, 2011, **11**, 320–332.
